# Supplementary material for: QSAR-Based Computational Approaches to Accelerate the Discovery of Sigma-2 Receptor (S2R) Ligands as Therapeutic Drugs
Source: MDPI journal article supplement (doi:10.3390/molecules26175270), 2021-08-30
Supplement: s1 [file s1]

# QSAR-based Computational Approaches to Accelerate the Discovery of Sigma-2 Receptor (S2R) Ligands as Therapeutic Drugs

Yangxi Yu<sup>1</sup>, Hiep Dong<sup>2</sup>, Youyi Peng<sup>3</sup>, William J. Welsh<sup>1</sup> \*

<sup>1</sup> Department of Pharmacology, Robert Wood Johnson Medical School, Rutgers, The State University of New Jersey, Piscataway, NJ 08854, United States; yuyangxi@yeah.net, welshwj@rwjms.rutgers.edu

<sup>2</sup> Department of Medicinal Chemistry, Ernest Mario School of Pharmacy, Rutgers, The State University of New Jersey, Piscataway, New Jersey 08854, United States. hqd3@scarletmail.rutgers.edu

<sup>3</sup> Biomedical Informatics Shared Resource, Rutgers Cancer Institute of New Jersey, Rutgers, The State University of New Jersey, New Brunswick, NJ 08903, United States. pengyo@cinj.rutgers.edu

\* Corresponding author: welshwj@rwjms.rutgers.edu

**Figure S1.** Virtual screening cascade is depicted in Figure 1, basically involving QSAR modeling, pharmacophore screening, and shape-based screening.

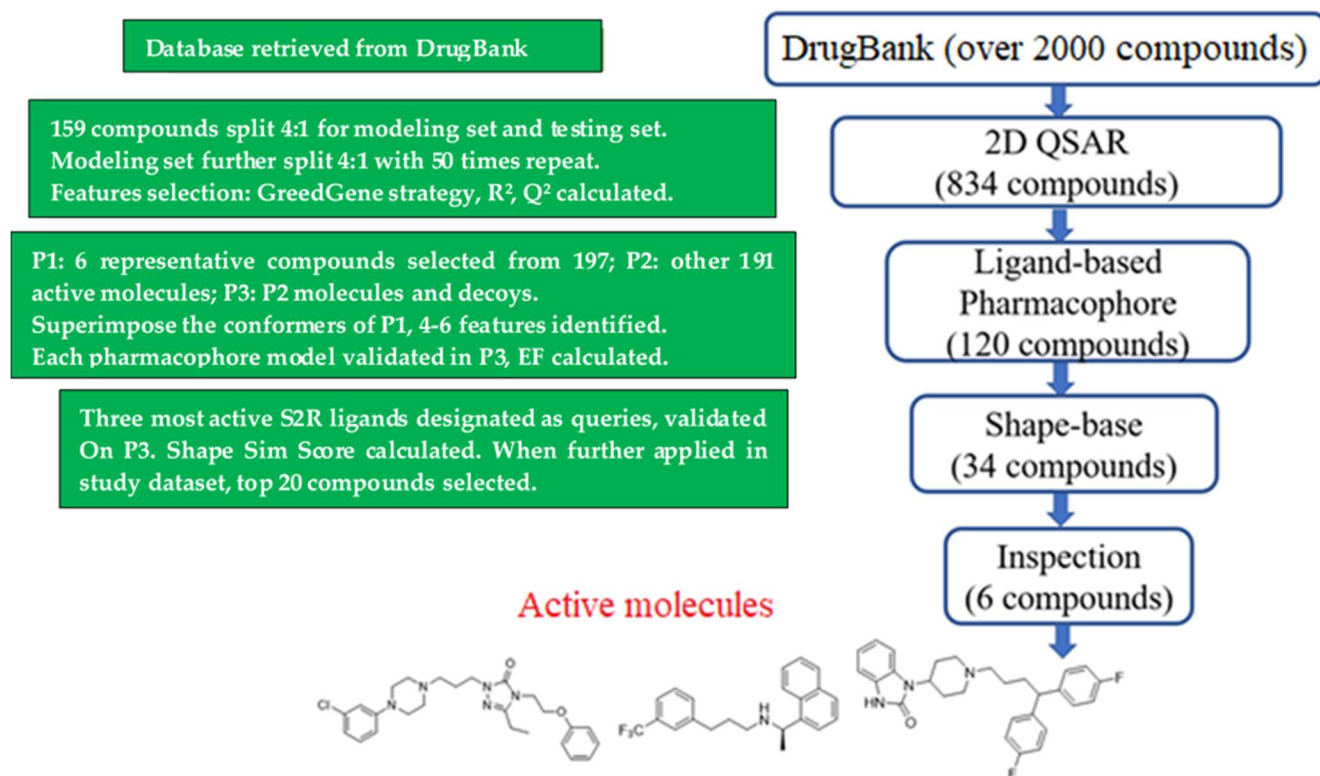

**Table S1:** Structures and activity data of all S2R ligands pooled from different sources for the present 2D-QSAR studies <sup>1-15</sup>

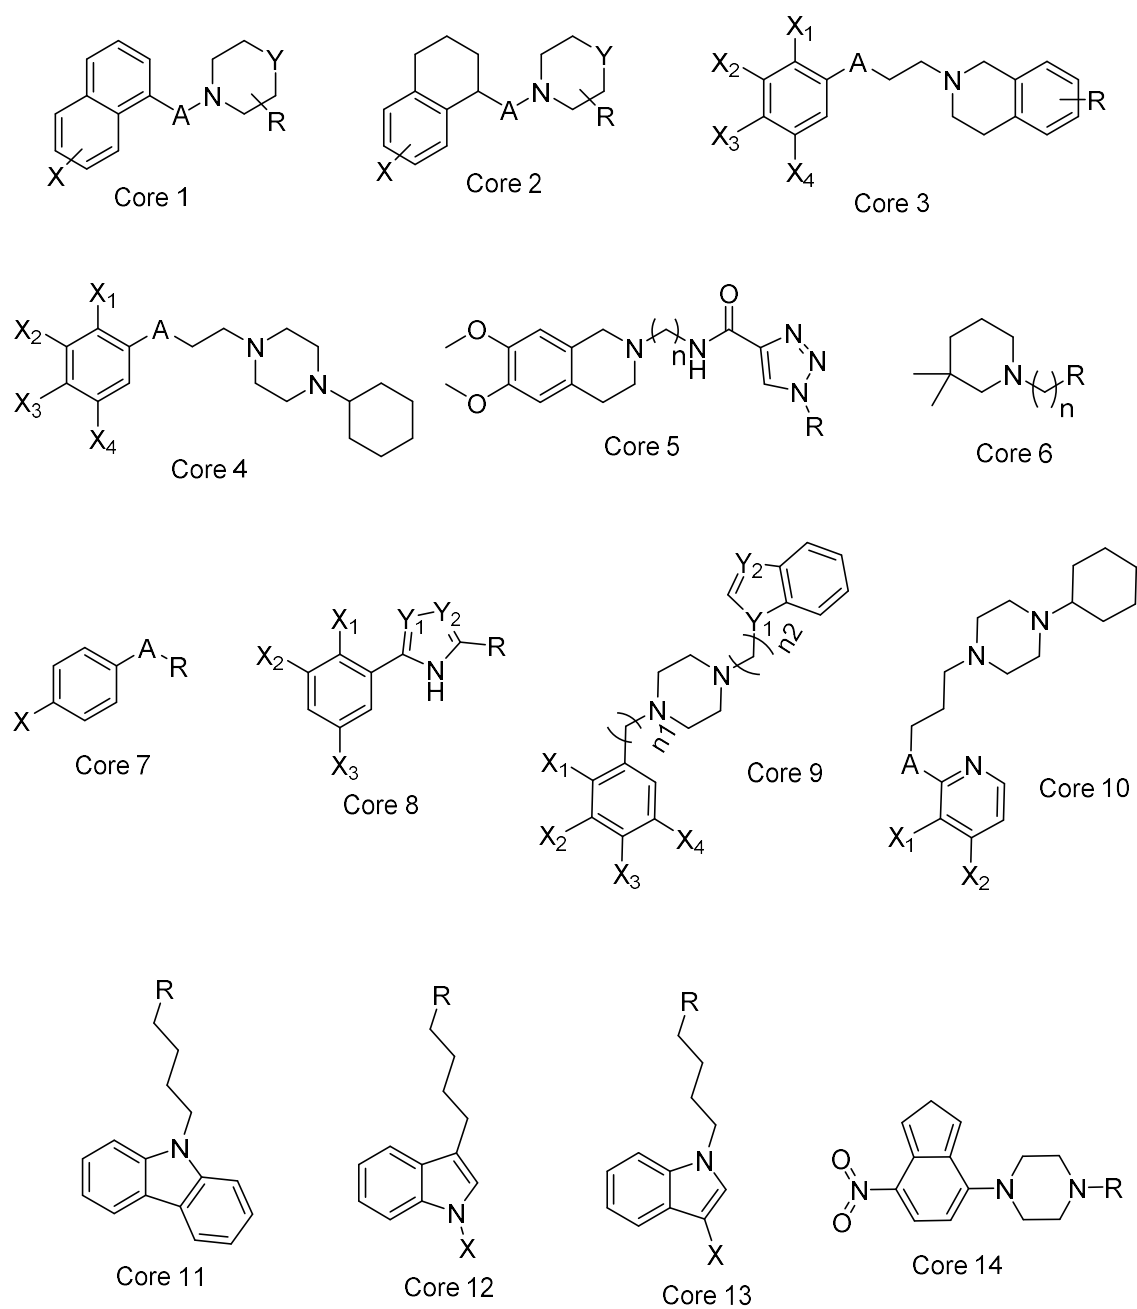

**Table S2.** Summary of the specific scaffold (core), nature of the substituents X, Y, A, etc., values of the experimental and QSAR model-predicted pK<sub>i</sub>, the Residual (Res.) = Exp. pK<sub>i</sub> – Pred. pK<sub>i</sub>, and the identification of the dataset.

| No | Core | X                  | Y               | R                                                                                   | A                                                                                   | Exp. pK <sub>i</sub> | Pred. pK <sub>i</sub> | Res. # | Set |
|----|------|--------------------|-----------------|-------------------------------------------------------------------------------------|-------------------------------------------------------------------------------------|----------------------|-----------------------|--------|-----|
| 1  | 1    | 6-OCH <sub>3</sub> | NH              | 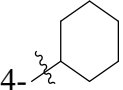   |    | 8.03                 | 7.99                  | -0.04  | M   |
| 2  | 1    | H                  | NH              |    |    | 9.16                 | 8.04                  | -1.12  | M   |
| 3  | 1    | 5-OCH <sub>3</sub> | CH <sub>2</sub> | H                                                                                   |    | 6.76                 | 7.11                  | 0.35   | M   |
| 4  | 1    | 5-OCH <sub>3</sub> | CH <sub>2</sub> | H                                                                                   |    | 6.82                 | 7.55                  | 0.73   | M   |
| 5  | 1    | 5-OCH <sub>3</sub> | CH <sub>2</sub> | 2,2-di-CH <sub>3</sub>                                                              |    | 7.04                 | 6.95                  | -0.09  | M   |
| 6  | 1    | 5-OCH <sub>3</sub> | CH <sub>2</sub> | 3,3-di-CH <sub>3</sub>                                                              |    | 7.17                 | 7.53                  | 0.36   | M   |
| 7  | 1    | 5-OCH <sub>3</sub> | CH <sub>2</sub> | 4,4-di-CH <sub>3</sub>                                                              |    | 7.58                 | 7.19                  | -0.39  | M   |
| 8  | 1    | 5-OCH <sub>3</sub> | CH <sub>2</sub> | 4-CH <sub>3</sub>                                                                   |    | 7.75                 | 7.62                  | -0.13  | M   |
| 9  | 1    | 5-OCH <sub>3</sub> | CH <sub>2</sub> | 4,4-di-CH <sub>3</sub>                                                              |  | 7.75                 | 7.63                  | -0.12  | M   |
| 10 | 1    | 5-OCH <sub>3</sub> | CH <sub>2</sub> | 2-CH <sub>3</sub>                                                                   |  | 7.06                 | 7.05                  | -0.01  | M   |
| 11 | 1    | 5-OCH <sub>3</sub> | CH <sub>2</sub> | 2-CH <sub>3</sub>                                                                   |  | 7.19                 | 7.56                  | 0.37   | M   |
| 12 | 1    | 5-OCH <sub>3</sub> | CH <sub>2</sub> | 3-CH <sub>3</sub>                                                                   |  | 7.22                 | 7.12                  | -0.1   | M   |
| 13 | 1    | 5-OCH <sub>3</sub> | CH <sub>2</sub> | 2-CH <sub>3</sub>                                                                   |  | 7.31                 | 7.51                  | 0.2    | M   |
| 14 | 1    | 5-OCH <sub>3</sub> | CH <sub>2</sub> | H                                                                                   |  | 7.58                 | 7.34                  | -0.24  | M   |
| 15 | 1    | 4-OCH <sub>3</sub> | CH <sub>2</sub> | 3,3-di-CH <sub>3</sub>                                                              |  | 6.17                 | 7.00                  | 0.83   | M   |
| 16 | 1    | 6-OCH <sub>3</sub> | CH <sub>2</sub> | 3,3-di-CH <sub>3</sub>                                                              |  | 6.19                 | 6.96                  | 0.77   | M   |
| 17 | 1    | 5-OH               | CH <sub>2</sub> | 3,3-di-CH <sub>3</sub>                                                              |  | 6.22                 | 6.81                  | 0.59   | M   |
| 18 | 1    | 4-OH               | CH <sub>2</sub> | 3,3-di-CH <sub>3</sub>                                                              |  | 6.39                 | 6.77                  | 0.38   | M   |
| 19 | 1    | 5-OH               | NH              |  |  | 7.58                 | 7.79                  | 0.21   | M   |
| 20 | 1    | 4-OH               | NH              |  |  | 7.93                 | 7.76                  | -0.17  | M   |
| 21 | 1    | 5-OCH <sub>3</sub> | NH              |  |  | 8.04                 | 8.06                  | 0.02   | M   |

|    |   |                     |                 |                                                                                     |                                                                                     |      |      |       |    |
|----|---|---------------------|-----------------|-------------------------------------------------------------------------------------|-------------------------------------------------------------------------------------|------|------|-------|----|
| 22 | 1 | 6-OCH <sub>3</sub>  | NH              | 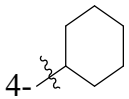   |    | 7.63 | 6.91 | -0.72 | M  |
| 23 | 1 | 6-OCH <sub>3</sub>  | NH              |    |    | 7.73 | 7.51 | -0.22 | M  |
| 24 | 1 | 6-OCH <sub>3</sub>  | NH              |    |    | 8.62 | 7.79 | -0.83 | M  |
| 25 | 2 | 6-O-CH <sub>3</sub> | NH              |    |    | 7.84 | 7.99 | 0.15  | M  |
| 26 | 2 | 6-O-CH <sub>3</sub> | NH              |    |    | 7.95 | 8.26 | 0.31  | M  |
| 27 | 2 | 6-O-CH <sub>3</sub> | NH              |    |    | 8.23 | 7.39 | -0.84 | M  |
| 28 | 2 | 6-O-CH <sub>3</sub> | NH              |    |    | 9.31 | 8.22 | -1.09 | M  |
| 29 | 1 | H                   | NH              |   |   | 7.52 | 8.43 | 0.91  | EE |
| 30 | 1 | H                   | NH              |  |  | 9.24 | 8.80 | -0.44 | EE |
| 31 | 1 | 5-OCH <sub>3</sub>  | CH <sub>2</sub> | 3,3-di-CH <sub>3</sub>                                                              |  | 6.62 | 7.08 | 0.46  | EE |
| 32 | 1 | 5-OCH <sub>3</sub>  | CH <sub>2</sub> | 4-CH <sub>3</sub>                                                                   |  | 7.41 | 7.18 | -0.23 | EE |
| 33 | 1 | 5-OCH <sub>3</sub>  | CH <sub>2</sub> | 2,2-di-CH <sub>3</sub>                                                              |  | 7.54 | 7.42 | -0.12 | EE |
| 34 | 1 | 4-OCH <sub>3</sub>  | NH              |  |  | 8.08 | 8.00 | -0.08 | EE |

| No | Core | X <sub>1</sub>    | X <sub>2</sub>    | X <sub>3</sub> | X <sub>4</sub> | R                       | A                                                                                    | pK <sub>i</sub><br>exp | pK <sub>i</sub><br>pred | Res. <sup>#</sup> | Set |
|----|------|-------------------|-------------------|----------------|----------------|-------------------------|--------------------------------------------------------------------------------------|------------------------|-------------------------|-------------------|-----|
| 35 | 3    | -OCH <sub>3</sub> | -OCH <sub>3</sub> | H              | Br             | 5,6-di-OCH <sub>3</sub> | 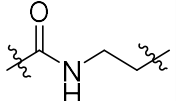 | 8.09                   | 7.98                    | -0.11             | M   |
| 36 | 3    | -OCH <sub>3</sub> | -OCH <sub>3</sub> | H              | Br             | H                       |  | 6.14                   | 7.14                    | 1                 | M   |
| 37 | 3    | -OCH <sub>3</sub> | -OCH <sub>3</sub> | H              | Br             | 5,6-di-OCH <sub>3</sub> |  | 7.79                   | 7.15                    | -0.64             | M   |

|    |   |                                                                                     |                                  |                                      |                                      |                             |                                                                                      |      |      |       |    |
|----|---|-------------------------------------------------------------------------------------|----------------------------------|--------------------------------------|--------------------------------------|-----------------------------|--------------------------------------------------------------------------------------|------|------|-------|----|
| 38 | 3 | <sup>-</sup><br>OCH <sub>3</sub>                                                    | H                                | H                                    | <sup>-</sup><br>CH <sub>3</sub>      | 5,6-di-<br>OCH <sub>3</sub> | 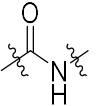   | 7.88 | 7.23 | -0.65 | M  |
| 39 | 3 | <sup>-</sup><br>OCH <sub>3</sub>                                                    | H                                | H                                    | Br                                   | 5,6-di-<br>OCH <sub>3</sub> |    | 7.91 | 7.23 | -0.68 | M  |
| 40 | 3 | Br                                                                                  | H                                | <sup>-</sup><br>OC<br>H <sub>3</sub> | <sup>-</sup><br>OC<br>H <sub>3</sub> | 5,6-di-<br>OCH <sub>3</sub> |    | 7.29 | 7.67 | 0.38  | M  |
| 41 | 3 | <sup>-</sup><br>OCH <sub>3</sub>                                                    | H                                | H                                    | <sup>-</sup><br>CH <sub>3</sub>      | 5,6-di-<br>OCH <sub>3</sub> |    | 8.06 | 8.05 | -0.01 | M  |
| 42 | 3 | <sup>-</sup><br>OCH <sub>3</sub>                                                    | H                                | H                                    | <sup>-</sup><br>CH <sub>3</sub>      | 5,6-di-<br>OCH <sub>3</sub> |    | 8.58 | 7.65 | -0.93 | M  |
| 43 | 3 |    |                                  |                                      |                                      |                             |                                                                                      | 7.67 | 7.88 | 0.21  | M  |
| 44 | 3 |   |                                  |                                      |                                      |                             |                                                                                      | 7.32 | 7.79 | 0.47  | M  |
| 45 | 3 |  |                                  |                                      |                                      |                             |                                                                                      | 8.32 | 7.91 | -0.41 | M  |
| 46 | 4 | <sup>-</sup><br>OCH <sub>3</sub>                                                    | H                                | H                                    | <sup>-</sup><br>CH <sub>3</sub>      | -                           |  | 7.58 | 7.81 | 0.23  | M  |
| 47 | 4 | <sup>-</sup><br>OCH <sub>3</sub>                                                    | <sup>-</sup><br>OCH <sub>3</sub> | H                                    | Br                                   | -                           |  | 7.67 | 7.70 | 0.03  | M  |
| 48 | 4 |  |                                  |                                      |                                      |                             |                                                                                      | 7.58 | 8.01 | 0.43  | M  |
| 49 | 3 | <sup>-</sup><br>OCH <sub>3</sub>                                                    | H                                | H                                    | <sup>-</sup><br>CH <sub>3</sub>      | 5,6-di-<br>OCH <sub>3</sub> |  | 7.99 | 8.05 | 0.06  | EE |
| 50 | 3 | <sup>-</sup><br>OCH <sub>3</sub>                                                    | <sup>-</sup><br>OCH <sub>3</sub> | H                                    | Br                                   | 5,6-di-<br>OCH <sub>3</sub> |  | 7.89 | 7.58 | -0.31 | EE |

| No | Core | n | R                                                                                   | pK <sub>i</sub><br>exp | pK <sub>i</sub><br>pred | Res. # | Set |
|----|------|---|-------------------------------------------------------------------------------------|------------------------|-------------------------|--------|-----|
| 51 | 5    | 2 | 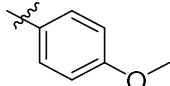   | 6.39                   | 7.16                    | 0.77   | M   |
| 52 | 5    | 2 |    | 6.67                   | 7.21                    | 0.54   | M   |
| 53 | 5    | 2 |    | 6.74                   | 7.11                    | 0.37   | M   |
| 54 | 5    | 2 |    | 6.81                   | 7.16                    | 0.35   | M   |
| 55 | 5    | 2 |    | 6.82                   | 7.06                    | 0.24   | M   |
| 56 | 5    | 2 |    | 7.03                   | 7.25                    | 0.22   | M   |
| 57 | 5    | 4 |    | 7.21                   | 7.58                    | 0.37   | M   |
| 58 | 5    | 4 |  | 7.32                   | 7.65                    | 0.33   | M   |
| 59 | 5    | 4 |  | 7.62                   | 7.43                    | -0.19  | M   |
| 60 | 5    | 4 |  | 7.65                   | 7.64                    | -0.01  | M   |
| 61 | 5    | 4 |  | 7.66                   | 7.58                    | -0.08  | M   |
| 62 | 5    | 4 |  | 7.91                   | 7.88                    | -0.03  | M   |
| 63 | 5    | 4 |  | 7.97                   | 7.91                    | -0.06  | M   |
| 64 | 5    | 4 |  | 8.30                   | 7.95                    | -0.35  | M   |
| 65 | 5    | 4 |  | 8.52                   | 7.84                    | -0.68  | M   |
| 66 | 5    | 4 |  | 8.82                   | 7.79                    | -1.03  | M   |

|    |                                                                                     |   |                                                                                     |      |      |       |    |
|----|-------------------------------------------------------------------------------------|---|-------------------------------------------------------------------------------------|------|------|-------|----|
| 67 | 6                                                                                   | 3 | 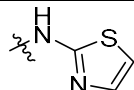   | 5.48 | 5.98 | 0.5   | M  |
| 68 | 6                                                                                   | 3 |    | 5.70 | 6.56 | 0.86  | M  |
| 69 | 6                                                                                   | 1 |    | 5.74 | 6.42 | 0.68  | M  |
| 70 | 6                                                                                   | 3 |    | 6.71 | 6.64 | -0.07 | M  |
| 71 | 6                                                                                   | 3 |    | 6.96 | 6.68 | -0.28 | M  |
| 72 | 6                                                                                   | 3 |    | 7.20 | 7.12 | -0.08 | M  |
| 73 | 6                                                                                   | 3 |   | 7.37 | 7.05 | -0.32 | M  |
| 74 |  |   |                                                                                     | 7.91 | 8.21 | 0.3   | M  |
| 75 | 5                                                                                   | 4 | H                                                                                   | 5.99 | 6.92 | 0.93  | EE |
| 76 | 5                                                                                   | 4 |  | 7.6  | 7.51 | -0.09 | EE |
| 77 | 5                                                                                   | 4 |  | 7.94 | 7.66 | -0.28 | EE |
| 78 | 5                                                                                   | 4 |  | 8.01 | 7.87 | -0.14 | EE |
| 79 | 5                                                                                   | 4 |  | 8.26 | 7.88 | -0.38 | EE |
| 80 | 6                                                                                   | 3 |  | 6.13 | 6.91 | 0.78  | EE |
| 81 | 6                                                                                   | 4 |  | 7.71 | 7.08 | -0.63 | EE |



| No | Core | X                                          | A                                                                                   | R                                                                                   | pK <sub>i</sub><br>exp | pK <sub>i</sub><br>pred | Res. # | Set |
|----|------|--------------------------------------------|-------------------------------------------------------------------------------------|-------------------------------------------------------------------------------------|------------------------|-------------------------|--------|-----|
| 82 | 7    | F                                          | 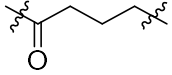   |    | 6.49                   | 6.52                    | 0.03   | M   |
| 83 | 7    | -<br>OCH <sub>2</sub><br>CH <sub>2</sub> F | -CH <sub>2</sub> -                                                                  |    | 6.56                   | 7.13                    | 0.57   | M   |
| 84 | 7    | Br                                         | -CH <sub>2</sub> -                                                                  |    | 6.63                   | 6.66                    | 0.03   | M   |
| 85 | 7    | I                                          | -CH <sub>2</sub> -                                                                  |    | 6.63                   | 6.66                    | 0.03   | M   |
| 86 | 7    | F                                          | -CH <sub>2</sub> -                                                                  |  | 6.79                   | 6.65                    | -0.14  | M   |
| 87 | 7    | -<br>OCH <sub>2</sub><br>CH <sub>2</sub> F | -CH <sub>2</sub> -                                                                  |  | 6.79                   | 6.66                    | -0.13  | M   |
| 88 | 7    | F                                          |  |  | 6.97                   | 6.96                    | -0.01  | M   |
| 89 | 7    | F                                          |  |  | 7.05                   | 6.76                    | -0.29  | M   |
| 90 | 7    | -<br>OCH <sub>3</sub>                      | -CH <sub>2</sub> -                                                                  |  | 6.28                   | 6.79                    | 0.51   | EE  |
| 91 | 7    | F                                          |  |  | 6.30                   | 6.30                    | 0      | EE  |
| 92 | 7    | F                                          |  |  | 6.46                   | 6.34                    | -0.12  | EE  |
| 93 | 7    | F                                          |  |  | 6.51                   | 7.19                    | 0.68   | EE  |
| 94 | 7    | F                                          |  |  | 6.75                   | 7.63                    | 0.88   | EE  |

|    |   |   |  |  |      |      |       |    |
|----|---|---|--|--|------|------|-------|----|
| 95 | 7 | F |  |  | 6.86 | 6.53 | -0.33 | EE |
| 96 | 7 | F |  |  | 6.93 | 6.74 | -0.19 | EE |
| 97 | 7 | F |  |  | 7.64 | 6.97 | -0.67 | EE |

| No  | Core | X <sub>1</sub>                   | X <sub>2</sub>                   | X <sub>3</sub> | Y <sub>1</sub> | Y <sub>2</sub> | R | pK <sub>i</sub><br>exp | pK <sub>i</sub><br>pred | Res. # | Set |
|-----|------|----------------------------------|----------------------------------|----------------|----------------|----------------|---|------------------------|-------------------------|--------|-----|
| 98  | 8    | <sup>-</sup><br>OCH <sub>3</sub> | <sup>-</sup><br>OCH <sub>3</sub> | Br             | N              | CH             |   | 6.39                   | 6.57                    | 0.18   | M   |
| 99  | 8    | <sup>-</sup><br>OCH <sub>3</sub> | <sup>-</sup><br>OCH <sub>3</sub> | H              | N              | O              |   | 6.60                   | 6.65                    | 0.05   | M   |
| 100 | 8    | <sup>-</sup><br>OCH <sub>3</sub> | <sup>-</sup><br>OCH <sub>3</sub> | Br             | N              | CH             |   | 6.85                   | 6.85                    | 0      | M   |
| 101 | 8    | <sup>-</sup><br>OCH <sub>3</sub> | <sup>-</sup><br>OCH <sub>3</sub> | Br             | N              | CH             |   | 6.95                   | 6.69                    | -0.26  | M   |
| 102 | 8    | <sup>-</sup><br>OCH <sub>3</sub> | <sup>-</sup><br>OCH <sub>3</sub> | Br             | CH             | CH             |   | 6.29                   | 5.77                    | -0.52  | M   |
| 104 | 8    | <sup>-</sup><br>OCH <sub>3</sub> | <sup>-</sup><br>OCH <sub>3</sub> | Br             | CH             | CH             |   | 6.34                   | 6.83                    | 0.49   | M   |
| 105 | 8    | <sup>-</sup><br>OCH <sub>3</sub> | <sup>-</sup><br>OCH <sub>3</sub> | Br             | CH             | CH             |   | 6.45                   | 7.10                    | 0.65   | M   |
| 106 | 8    | <sup>-</sup><br>OCH <sub>3</sub> | <sup>-</sup><br>OCH <sub>3</sub> | Br             | CH             | CH             |   | 6.51                   | 6.69                    | 0.18   | M   |
| 107 | 8    | <sup>-</sup><br>OCH <sub>3</sub> | <sup>-</sup><br>OCH <sub>3</sub> | Br             | CH             | CH             |   | 6.66                   | 6.98                    | 0.32   | M   |
| 108 | 8    | <sup>-</sup><br>OCH <sub>3</sub> | <sup>-</sup><br>OCH <sub>3</sub> | Br             | CH             | CH             |   | 7.06                   | 7.15                    | 0.09   | M   |
| 109 | 8    | <sup>-</sup><br>OCH <sub>3</sub> | <sup>-</sup><br>OCH <sub>3</sub> | Br             | CH             | CH             |   | 7.28                   | 6.69                    | -0.59  | M   |
| 110 | 8    | <sup>-</sup><br>OCH <sub>3</sub> | <sup>-</sup><br>OCH <sub>3</sub> | Br             | CH             | CH             |   | 7.59                   | 7.35                    | -0.24  | M   |

|            |   |                       |                       |    |    |    |                                                                                    |      |      |      |    |
|------------|---|-----------------------|-----------------------|----|----|----|------------------------------------------------------------------------------------|------|------|------|----|
| <b>103</b> | 8 | -<br>OCH <sub>3</sub> | -<br>OCH <sub>3</sub> | Br | CH | CH | 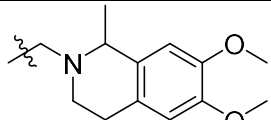 | 6.30 | 6.67 | 0.37 | EE |
|------------|---|-----------------------|-----------------------|----|----|----|------------------------------------------------------------------------------------|------|------|------|----|

| No         | Core | X <sub>1</sub> | X <sub>2</sub> | X <sub>3</sub> | X <sub>4</sub> | Y <sub>1</sub> | Y <sub>2</sub>    | n <sub>1</sub> | n <sub>2</sub> | pK <sub>i</sub><br>exp | pK <sub>i</sub><br>pred | Res. # | Set |
|------------|------|----------------|----------------|----------------|----------------|----------------|-------------------|----------------|----------------|------------------------|-------------------------|--------|-----|
| <b>111</b> | 9    | H              | H              | F              | H              | C              | N                 | 0              | 1              | 6.18                   | 6.86                    | 0.68   | M   |
| <b>112</b> | 9    | H              | H              | H              | H              | N              | C-CH <sub>3</sub> | 2              | 1              | 7.25                   | 7.15                    | -0.1   | M   |
| <b>113</b> | 9    | F              | H              | H              | H              | N              | CH                | 0              | 3              | 8.00                   | 7.58                    | -0.42  | M   |
| <b>114</b> | 9    | F              | H              | H              | F              | C              | N                 | 1              | 1              | 6.38                   | 6.85                    | 0.47   | EE  |
| <b>115</b> | 9    | H              | F              | F              | H              | C              | N                 | 1              | 1              | 6.89                   | 6.93                    | 0.04   | EE  |
| <b>116</b> | 9    | H              | H              | F              | H              | N              | CH                | 0              | 3              | 7.70                   | 7.65                    | -0.05  | EE  |

| No         | Core | X <sub>1</sub>                                                                      | X <sub>2</sub>    | A                                                                                   | pK <sub>i</sub> exp | pK <sub>i</sub> pred | Res. # | Set |
|------------|------|-------------------------------------------------------------------------------------|-------------------|-------------------------------------------------------------------------------------|---------------------|----------------------|--------|-----|
| <b>117</b> | 10   | H                                                                                   | -OCH <sub>3</sub> | 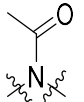  | 6.61                | 6.97                 | 0.36   | M   |
| <b>118</b> | 10   | H                                                                                   | H                 | -NH-                                                                                | 7.15                | 7.06                 | -0.09  | M   |
| <b>119</b> | 10   | H                                                                                   | -OCH <sub>3</sub> | -NH-                                                                                | 7.22                | 7.09                 | -0.13  | M   |
| <b>120</b> | 10   | H                                                                                   | -OCH <sub>3</sub> |  | 7.52                | 7.72                 | 0.2    | M   |
| <b>121</b> | 10   | H                                                                                   | H                 |  | 7.83                | 7.15                 | -0.68  | M   |
| <b>122</b> | 10   | H                                                                                   | H                 |  | 8.17                | 8.52                 | 0.35   | M   |
| <b>123</b> | 10   | H                                                                                   | H                 |  | 8.45                | 8.15                 | -0.3   | M   |
| <b>124</b> | 10   |  |                   |                                                                                     | 7.73                | 7.70                 | -0.03  | M   |
| <b>125</b> | 10   |  |                   |                                                                                     | 7.79                | 7.60                 | -0.19  | M   |

|     |    |                                                                                   |   |                                                                                    |      |      |       |    |
|-----|----|-----------------------------------------------------------------------------------|---|------------------------------------------------------------------------------------|------|------|-------|----|
| 126 | 10 | 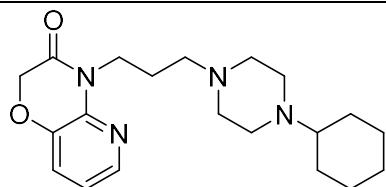 |   |                                                                                    | 7.80 | 7.63 | -0.17 | M  |
| 127 | 10 |  |   |                                                                                    | 8.01 | 7.67 | -0.34 | M  |
| 128 | 10 |  |   |                                                                                    | 8.19 | 8.43 | 0.24  | M  |
| 129 | 10 |  |   |                                                                                    | 8.79 | 8.06 | -0.73 | M  |
| 130 | 10 | H                                                                                 | H |  | 6.51 | 6.92 | 0.41  | EE |

| No  | Core | R                                                                                   | X | pK <sub>i</sub><br>exp | pK <sub>i</sub><br>pred | Res. # | Set |
|-----|------|-------------------------------------------------------------------------------------|---|------------------------|-------------------------|--------|-----|
| 131 | 11   | 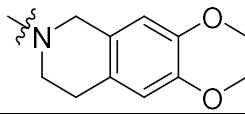 | - | 10.40                  | 8.62                    | -1.78  | M   |
| 132 | 11   |  | - | 7.93                   | 8.75                    | 0.82   | M   |
| 133 | 11   |  | - | 8.12                   | 8.71                    | 0.59   | M   |
| 134 | 11   |  | - | 8.49                   | 9.02                    | 0.53   | M   |
| 135 | 12   |  | H | 8.19                   | 7.99                    | -0.2   | M   |

|     |    |                                                                                     |                                                                                     |      |      |       |   |
|-----|----|-------------------------------------------------------------------------------------|-------------------------------------------------------------------------------------|------|------|-------|---|
| 136 | 12 | 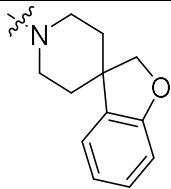   |    | 7.90 | 8.60 | 0.7   | M |
| 137 | 12 |    |    | 7.54 | 8.18 | 0.64  | M |
| 138 | 12 |    |    | 8.14 | 8.26 | 0.12  | M |
| 139 | 12 |    |    | 9.57 | 8.30 | -1.27 | M |
| 140 | 12 |    |    | 7.17 | 8.11 | 0.94  | M |
| 141 | 12 |  |  | 8.52 | 8.41 | -0.11 | M |
| 142 | 12 |  |  | 7.36 | 7.92 | 0.56  | M |
| 143 | 13 |  |  | 7.53 | 7.92 | 0.39  | M |
| 144 | 13 |  |  | 7.55 | 7.39 | -0.16 | M |
| 145 | 13 |  |  | 7.56 | 7.38 | -0.18 | M |
| 146 | 14 |  | -                                                                                   | 5.33 | 5.86 | 0.53  | M |
| 147 | 14 |  | -                                                                                   | 6.24 | 5.65 | -0.59 | M |
| 148 | 14 |  | -                                                                                   | 6.41 | 6.57 | 0.16  | M |

|     |                                                                                    |                                                                                     |                                                                                     |      |      |       |    |
|-----|------------------------------------------------------------------------------------|-------------------------------------------------------------------------------------|-------------------------------------------------------------------------------------|------|------|-------|----|
| 149 | 14                                                                                 | 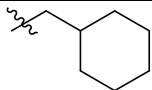   | -                                                                                   | 6.42 | 6.09 | -0.33 | M  |
| 150 | 14                                                                                 |    | -                                                                                   | 6.45 | 5.55 | -0.9  | M  |
| 151 | 14                                                                                 |    | -                                                                                   | 6.56 | 6.40 | -0.16 | M  |
| 152 | 14                                                                                 |    | -                                                                                   | 6.65 | 6.26 | -0.39 | M  |
| 153 | 14                                                                                 |    | -                                                                                   | 6.68 | 6.77 | 0.09  | M  |
| 154 | 14                                                                                 |    | -                                                                                   | 7.25 | 6.80 | -0.45 | M  |
| 155 |  |                                                                                     |                                                                                     | 7.91 | 7.76 | -0.15 | M  |
| 156 | 12                                                                                 |  |  | 7.27 | 8.17 | 0.9   | EE |
| 157 | 12                                                                                 |  |  | 7.31 | 8.19 | 0.88  | EE |
| 158 | 12                                                                                 |  |  | 7.32 | 8.04 | 0.72  | EE |
| 159 | 14                                                                                 |  | -                                                                                   | 6.50 | 5.66 | -0.84 | EE |

#: Res. (Residual) =  $pK_i$  pred -  $pK_i$  exp; \*: M: Modeling dataset; EE: External evaluation dataset

**Table S3:** SMILES structure for all S2R ligands used in the present study.

| No | SMILES structure                                                          |
|----|---------------------------------------------------------------------------|
| 1  | <chem>C(CCC1c2c([nH]c1)cccc2)C[N+]1CCN(C2CCCCC2)CC1</chem>                |
| 2  | <chem>C(C[N+]1CCN(C2CCCCC2)CC1)Cn1c2c(c3c1cccc3)cccc2</chem>              |
| 3  | <chem>C(CCN1c2c(c3c1cccc3)cccc2)C[N+]1CCC(C2CCCCC2)CC1</chem>             |
| 4  | <chem>Fc1ccc(C2CC[N+](CCCCn3c4c(c5c3cccc5)cccc4)CC2)cc1</chem>            |
| 5  | <chem>C(CCN1c2c(c3c1cccc3)cccc2)C[N+]1CCC2(OCc3c2cccc3)CC1</chem>         |
| 6  | <chem>O(C)c1c(OC)cc2c(c1)C[N+](CCCCn1c3c(c4c1cccc4)cccc3)CC2</chem>       |
| 7  | <chem>Fc1ccc(-n2c3c(c(CCCC[N+]4CCC(C5CCCCC5)CC4)c2)cccc3)cc1</chem>       |
| 8  | <chem>Fc1ccc(-n2c3c(c(CCCC[N+]4CCN(C5CCCCC5)CC4)c2)cccc3)cc1</chem>       |
| 9  | <chem>Fc1ccc(-n2c3c(c(CCCC[N+]4CCC(c5ccc(F)cc5)CC4)c2)cccc3)cc1</chem>    |
| 10 | <chem>Fc1ccc(-n2c3c(c(CCCC[N+]4CCC5(OCc6c5cccc6)CC4)c2)cccc3)cc1</chem>   |
| 11 | <chem>Fc1ccc(-n2c3c(c(CCCC[N+]4Cc5c(cc(OC)c(OC)c5)CC4)c2)cccc3)cc1</chem> |
| 12 | <chem>Fc1ccc(-n2c3c(c(CCCC[N+]Cc4ccc(OC)cc4)c2)cccc3)cc1</chem>           |
| 13 | <chem>Fc1ccc(-n2c3c(c(CCCC[N+]Cc4cc(OC)ccc4)c2)cccc3)cc1</chem>           |
| 14 | <chem>Fc1ccc(-n2c3c(c(CCCC[N+]CCc4cc(OC)ccc4)c2)cccc3)cc1</chem>          |
| 15 | <chem>Fc1ccc(-n2c3c(c(CCCC[N+](CCc4ccc(OC)cc4)C)c2)cccc3)cc1</chem>       |
| 16 | <chem>Fc1ccc(-n2c3c(c(CCCC[N+](CCc4cc(OC)ccc4)C)c2)cccc3)cc1</chem>       |
| 17 | <chem>Fc1ccc(-n2c3c(c(CCCC[N+](CC)Cc4cc(OC)ccc4)c2)cccc3)cc1</chem>       |
| 18 | <chem>Fc1ccc(-n2c3c(c(CCCC[N+](CC)Cc4ccc(OC)cc4)c2)cccc3)cc1</chem>       |
| 19 | <chem>Fc1ccc(-n2c3c(c(CCCC[N+]Cc4cc(OC)c(OC)cc4)c2)cccc3)cc1</chem>       |
| 20 | <chem>Fc1ccc(-n2c3c(c(CCCC[N+]4Cc5c(cc(OC)c(OC)c5)CC4)c2)cccc3)cc1</chem> |
| 21 | <chem>Fc1ccc(-n2c3c(c(CCCC[N+](CCc4cc(OC)c(OC)cc4)C)c2)cccc3)cc1</chem>   |
| 22 | <chem>Fc1ccc(-n2c3c(c(CCCC[N+](CC)Cc4cc(OC)c(OC)cc4)c2)cccc3)cc1</chem>   |
| 23 | <chem>O(C)c1cc2c(c(CCC[N+]3CCCCC3)ccc2)cc1</chem>                         |
| 24 | <chem>O(C)c1cc2c(c(CCCC[N+]3CCCCC3)ccc2)cc1</chem>                        |
| 25 | <chem>O(C)c1cc2c(c(CCC[N+]3[C@H](C)CCCC3)ccc2)cc1</chem>                  |
| 26 | <chem>O(C)c1cc2c(c(CCC[N+]3[C@H](C)CCC3)ccc2)cc1</chem>                   |
| 27 | <chem>O(C)c1cc2c(c(CCC[N+]3CCC(C)CC3)ccc2)cc1</chem>                      |
| 28 | <chem>O(C)c1cc2c(c(CCC[N+]3C(C)(C)CCCC3)ccc2)cc1</chem>                   |
| 29 | <chem>O(C)c1cc2c(c(CCCC[N+]3[C@H](C)CCC3)ccc2)cc1</chem>                  |
| 30 | <chem>O(C)c1cc2c(c(CCCC[N+]3[C@H](C)CCCC3)ccc2)cc1</chem>                 |
| 31 | <chem>O(C)c1cc2c(c(CCC[N+]3CCC(C)(C)CC3)ccc2)cc1</chem>                   |
| 32 | <chem>O(C)c1cc2c(c(CCCC[N+]3CCC(C)CC3)ccc2)cc1</chem>                     |
| 33 | <chem>O(C)c1cc2c(c(CCCC[N+]3CC(C)(C)CCC3)ccc2)cc1</chem>                  |
| 34 | <chem>O(C)c1cc2c(c(CCCC[N+]3C(C)(C)CCCC3)ccc2)cc1</chem>                  |
| 35 | <chem>O(C)c1cc2c(c(CCCC[N+]3CCC(C)(C)CC3)ccc2)cc1</chem>                  |
| 36 | <chem>OC1cc2c(c(CCC[N+]3CC(C)(C)CCC3)ccc2)cc1</chem>                      |
| 37 | <chem>OC1cc2c(CCC[N+]3CC(C)(C)CCC3)cccc2cc1</chem>                        |
| 38 | <chem>O(C)c1cc2c(CCC[N+]3CC(C)(C)CCC3)cccc2cc1</chem>                     |
| 39 | <chem>O(C)c1c2c(c(CCC[N+]3CC(C)(C)CCC3)ccc2)ccc1</chem>                   |
| 40 | <chem>O(C)c1cc2c(c(CCC[N+]3CC(C)(C)CCC3)ccc2)cc1</chem>                   |
| 41 | <chem>OC1cc2c(c(CCC[N+]3CCN(C4CCCCC4)CC3)ccc2)cc1</chem>                  |
| 42 | <chem>OC1cc2c(CCC[N+]3CCN(C4CCCCC4)CC3)cccc2cc1</chem>                    |
| 43 | <chem>O(C)c1c2c(c(CCC[N+]3CCN(C4CCCCC4)CC3)ccc2)ccc1</chem>               |
| 44 | <chem>O(C)c1cc2c(c(CCC[N+]3CCN(C4CCCCC4)CC3)ccc2)cc1</chem>               |
| 45 | <chem>O(C)c1cc2c(CCC[N+]3CCN(C4CCCCC4)CC3)cccc2cc1</chem>                 |
| 46 | <chem>O(C)c1c2c(c(NCC[N+]3CCN(C4CCCCC4)CC3)ccc2)ccc1</chem>               |
| 47 | <chem>O(CC[N+]1CCN(C2CCCCC2)CC1)c1c2c(c(OC)ccc2)ccc1</chem>               |
| 48 | <chem>O(C)c1c2c([C@H](CCC[N+]3CCN(C4CCCCC4)CC3)CCC2)ccc1</chem>           |
| 49 | <chem>O(C)c1c2c([C@H](NCCN3CC[N+](C4CCCCC4)CC3)CCC2)ccc1</chem>           |
| 50 | <chem>O(CC[N+]1CCN(C2CCCCC2)CC1)[C@H]1c2c(c(OC)ccc2)CCC1</chem>           |

|     |                                                                               |
|-----|-------------------------------------------------------------------------------|
| 51  | <chem>O=C(Nc1c2c(c(OC)ccc2)ccc1)CN1CC[N+](C2CCCCC2)CC1</chem>                 |
| 52  | <chem>O=C(N[C@H]1c2c(c(OC)ccc2)CCC1)CN1CC[N+](C2CCCCC2)CC1</chem>             |
| 53  | <chem>O=[N+](O-)[c1cc2c(cc1)CC[N+](CCCCN1C(=O)c3c(C1=O)cccc3)C2</chem>        |
| 54  | <chem>O=[N+](O-)[c1cc2c(cc1)CC[N+](CCCCNC(=O)c1c(OC)c(OC)c(OC)cc1)C2</chem>   |
| 55  | <chem>C(CCC1CCCCC1)C[N+](C)CCC1</chem>                                        |
| 56  | <chem>C(C[N+](C)CCC1)Cn1c2c(cc1)cccc2</chem>                                  |
| 57  | <chem>C(C[N+](C)CCC1)Cc1c2c([nH]c1)cccc2</chem>                               |
| 58  | <chem>C(C[N+](C)CCC1)Cc1c2c(occ2)ccc1</chem>                                  |
| 59  | <chem>C(C[N+](C)CCC1)Cc1c2c(scc2)ccc1</chem>                                  |
| 60  | <chem>N(CCC[N+](C)CCC1)c1sc2c(n1)cccc2</chem>                                 |
| 61  | <chem>O=C(OC1CC2[N+](CCCC[N+])C(C1)CCC2)Nc1c(OC)ccc(C)c1</chem>               |
| 62  | <chem>O=C(OC1CC2[N+](CCCCC[N+])C(C1)CCC2)Nc1c(OC)ccc(C)c1</chem>              |
| 63  | <chem>O=C(OC1CC2[N+](CCCCCCCCC[N+])C(C1)CCC2)Nc1c(OC)ccc(C)c1</chem>          |
| 64  | <chem>Brc1cc(C[N+](CCCC[N+])2C3CC(OC(=O)Nc4c(OC)ccc(C)c4)CC2CCC3)ccc1</chem>  |
| 65  | <chem>Fc1cc(C[N+](CCCC[N+])2C3CC(OC(=O)Nc4c(OC)ccc(C)c4)CC2CCC3)ccc1</chem>   |
| 66  | <chem>lc1cc(C[N+](CCCC[N+])2C3CC(OC(=O)Nc4c(OC)ccc(C)c4)CC2CCC3)ccc1</chem>   |
| 67  | <chem>Brc1ccc(C[N+](CCCC[N+])2C3CC(OC(=O)Nc4c(OC)ccc(C)c4)CC2CCC3)cc1</chem>  |
| 68  | <chem>Fc1ccc(C[N+](CCCC[N+])2C3CC(OC(=O)Nc4c(OC)ccc(C)c4)CC2CCC3)cc1</chem>   |
| 69  | <chem>lc1ccc(C[N+](CCCC[N+])2C3CC(OC(=O)Nc4c(OC)ccc(C)c4)CC2CCC3)cc1</chem>   |
| 70  | <chem>Brc1cc(C[N+](CCCCC[N+])2C3CC(OC(=O)Nc4c(OC)ccc(C)c4)CC2CCC3)ccc1</chem> |
| 71  | <chem>Fc1cc(C[N+](CCCCC[N+])2C3CC(OC(=O)Nc4c(OC)ccc(C)c4)CC2CCC3)ccc1</chem>  |
| 72  | <chem>lc1cc(C[N+](CCCCC[N+])2C3CC(OC(=O)Nc4c(OC)ccc(C)c4)CC2CCC3)ccc1</chem>  |
| 73  | <chem>Brc1ccc(C[N+](CCCCC[N+])2C3CC(OC(=O)Nc4c(OC)ccc(C)c4)CC2CCC3)cc1</chem> |
| 74  | <chem>Fc1ccc(C[N+](CCCCC[N+])2C3CC(OC(=O)Nc4c(OC)ccc(C)c4)CC2CCC3)cc1</chem>  |
| 75  | <chem>lc1ccc(C[N+](CCCCC[N+])2C3CC(OC(=O)Nc4c(OC)ccc(C)c4)CC2CCC3)cc1</chem>  |
| 76  | <chem>Clc1ccc(C(=O)NCCCCC[N+])2C3CC(OC(=O)Nc4c(OC)ccc(C)c4)CC2CCC3)cc1</chem> |
| 77  | <chem>Brc1ccc(C(=O)NCCCCC[N+])2C3CC(OC(=O)Nc4c(OC)ccc(C)c4)CC2CCC3)cc1</chem> |
| 78  | <chem>Fc1ccc(C(=O)NCCCCC[N+])2C3CC(OC(=O)Nc4c(OC)ccc(C)c4)CC2CCC3)cc1</chem>  |
| 79  | <chem>lc1ccc(C(=O)NCCCCC[N+])2C3CC(OC(=O)Nc4c(OC)ccc(C)c4)CC2CCC3)cc1</chem>  |
| 80  | <chem>O=C(NCC[N+](C)Cc2c(cc(OC)c(OC)c2)CC1)c1c(OC)ccc(C)c1</chem>             |
| 81  | <chem>O=C(NCCCC[N+](C)Cc2c(cc(OC)c(OC)c2)CC1)c1c(OC)ccc(C)c1</chem>           |
| 82  | <chem>Brc1cc(OC)c(OC)c(C(=O)NCC[N+])2Cc3c(cccc3)CC2)c1</chem>                 |
| 83  | <chem>Brc1c2c(c(OC)c(C(=O)NCC[N+])3Cc4c(cccc4)CC3)c1)cccc2</chem>             |
| 84  | <chem>Brc1cc(C(=O)NCC[N+])2Cc3c(cc(OC)c(OC)c3)CC2)c(OC)cc1</chem>             |
| 85  | <chem>Brc1cc(OC)c(OC)c(C(=O)NCC[N+])2Cc3c(cc(OC)c(OC)c3)CC2)c1</chem>         |
| 86  | <chem>Brc1c2c(c(OC)c(C(=O)NCC[N+])3Cc4c(cc(OC)c(OC)c4)CC3)c1)cccc2</chem>     |
| 87  | <chem>Brc1cc(OC)c(OC)c(C(=O)NCCCC[N+])2Cc3c(cc(OC)c(OC)c3)CC2)c1</chem>       |
| 88  | <chem>N(CCC[N+](C)CCN(C2CCCCC2)CC1)c1ncccc1</chem>                            |
| 89  | <chem>N(CCC[N+](C)CCN(C2CCCCC2)CC1)(CC)c1ncccc1</chem>                        |
| 90  | <chem>O(C)c1cc(NCCC[N+])2CCN(C3CCCCC3)CC2)ncc1</chem>                         |
| 91  | <chem>C(C[N+](C)CCN(C2CCCCC2)CC1)CN1c2ncccc2CCC1</chem>                       |
| 92  | <chem>O=C(N(CCC[N+](C)CCN(C2CCCCC2)CC1)c1ncccc1)C</chem>                      |
| 93  | <chem>C(C[N+](C)CCN(C2CCCCC2)CC1)CN1c2ncccc2OCC1</chem>                       |
| 94  | <chem>N(CCCC[N+](C)CCN(C2CCCCC2)CC1)(CC)c1ncccc1</chem>                       |
| 95  | <chem>O=C1N(CCC[N+])2CCN(C3CCCCC3)CC2)c2ncccc2CC1</chem>                      |
| 96  | <chem>C(CCN1c2ncccc2CCC1)C[N+](C)CCN(C2CCCCC2)CC1</chem>                      |
| 97  | <chem>O=C1N(CCC[N+])2CCN(C3CCCCC3)CC2)c2ncccc2OC1</chem>                      |
| 98  | <chem>N(CCCCC[N+](C)CCN(C2CCCCC2)CC1)(CC)c1ncccc1</chem>                      |
| 99  | <chem>O(C)c1cc(N(CCC[N+])2CCN(C3CCCCC3)CC2)CC)ncc1</chem>                     |
| 100 | <chem>C(CC[N+](C)CCN(C2CCCCC2)CC1)CCN1c2ncccc2CCC1</chem>                     |
| 101 | <chem>O=C(N(CCC[N+](C)CCN(C2CCCCC2)CC1)c1nccc(OC)c1)C</chem>                  |
| 102 | <chem>O=C1N(CCC[N+])2CCN(C3CCCCC3)CC2)CCc2c1cccc2</chem>                      |
| 103 | <chem>O(C)c1c(OC)cc2c(c1)C[N+](CCCCN1C(=O)c3c(cccc3)CC1)CC2</chem>            |
| 104 | <chem>Brc1cc(OC)c(OC)c(C(=O)NCCC[N+])2CCN(C3CCCCC3)CC2)c1</chem>              |
| 105 | <chem>Brc1c(C(=O)NCCC[N+])2Cc3c(cc(OC)c(OC)c3)CC2)cc(OC)c(OC)c1</chem>        |
| 106 | <chem>Brc1cc(OC)c(OC)c(C(=O)NCCC[N+])2Cc3c(cc(OC)c(OC)c3)CC2)c1</chem>        |
| 107 | <chem>O[C@@H]1C([N+])2C3CC(c4cccc4)CC2CC3)CCCC1</chem>                        |



|     |                                                                                  |
|-----|----------------------------------------------------------------------------------|
| 108 | <chem>O[C@@H]1C([N+]2C3CC(c4cccc4)CC2CC3)Cc2c(cccc2)C1</chem>                    |
| 109 | <chem>Fc1ccc(CN2CC([N+]3C4CC(c5cccc5)CC3CC4)[C@@H](O)CC2)cc1</chem>              |
| 110 | <chem>lc1cc(CN2CC([N+]3C4CC(c5cccc5)CC3CC4)[C@@H](O)CC2)ccc1</chem>              |
| 111 | <chem>Brc1ccc(C[C@H](O)C[N+]2C3CC(c4cccc4)CC2CC3)cc1</chem>                      |
| 112 | <chem>O[C@H](C[N+]1C2CC(c3cccc3)CC1CC2)c1cccc1</chem>                            |
| 113 | <chem>Brc1c([C@H](O)C[N+]2C3CC(c4cccc4)CC2CC3)cccc1</chem>                       |
| 114 | <chem>Brc1cc([C@H](O)C[N+]2C3CC(c4cccc4)CC2CC3)ccc1</chem>                       |
| 115 | <chem>Brc1ccc([C@H](O)C[N+]2C3CC(c4cccc4)CC2CC3)cc1</chem>                       |
| 116 | <chem>Clc1c([C@H](O)C[N+]2C3CC(c4cccc4)CC2CC3)c(Cl)ccc1</chem>                   |
| 117 | <chem>Clc1c(Cl)ccc([C@H](O)C[N+]2C3CC(c4cccc4)CC2CC3)c1</chem>                   |
| 118 | <chem>Fc1ccc(C(=O)C[N+]2C3CC(c4cccc4)CC2CC3)cc1</chem>                           |
| 119 | <chem>Fc1ccc(C(=O)CC[N+]2C3CC(c4cccc4)CC2CC3)cc1</chem>                          |
| 120 | <chem>Brc1c2c(c(OC)c(C(=O)N[C@@H]3C[N+](C4C5CCCC4CCC5)CC3)c1)cccc2</chem>        |
| 121 | <chem>Brc1c2c(c(OC)c(C(=O)N[C@@H]3C[N+](C4C5CC6CC4CC(C5)C6)CC3)c1)cccc2</chem>   |
| 122 | <chem>Brc1c2c(c(OC)c(C(=O)N[C@H]3[N+](C4C5CCCC4CCC5)CC3)c1)cccc2</chem>          |
| 123 | <chem>Brc1c2c(c(OC)c(C(=O)N[C@H]3[N+](C4C5CC6CC4CC(C5)C6)CC3)c1)cccc2</chem>     |
| 124 | <chem>Brc1c2c(c(OC)c(C(=O)NC3CC4[N+](C5CCCCC5)C(C3)CCC4)c1)cccc2</chem>          |
| 125 | <chem>Brc1c2c(c(OC)c(C(=O)NC3CC4[N+](C5CCCCC5)C(C3)CCC4)c1)cccc2</chem>          |
| 126 | <chem>Brc1c2c(c(OC)c(C(=O)NC3CC[N+](C4C5CCCC4CCC5)CC3)c1)cccc2</chem>            |
| 127 | <chem>Brc1c2c(c(OC)c(C(=O)NC3CC[N+](C4C5CC6CC4CC(C5)C6)CC3)c1)cccc2</chem>       |
| 128 | <chem>O=C(NCC[N+]1Cc2c(cc(OC)c(OC)c2)CC1)c1nnn(-c2ccc(OC)cc2)c1</chem>           |
| 129 | <chem>O=C(NCC[N+]1Cc2c(cc(OC)c(OC)c2)CC1)c1nnn(-c2cc(OC)ccc2)c1</chem>           |
| 130 | <chem>O=C(NCC[N+]1Cc2c(cc(OC)c(OC)c2)CC1)c1nnn(-c2c(OC)cccc2)c1</chem>           |
| 131 | <chem>O=C(NCCCC[N+]1Cc2c(cc(OC)c(OC)c2)CC1)c1c(OCC#C)ccc(C#N)c1</chem>           |
| 132 | <chem>O=C(NCCCC[N+]1Cc2c(cc(OC)c(OC)c2)CC1)c1nnn(Cc2cccc2)c1</chem>              |
| 133 | <chem>O=C(NCC[N+]1Cc2c(cc(OC)c(OC)c2)CC1)c1nnn(Cc2cc(OC)ccc2)c1</chem>           |
| 134 | <chem>O=C(NCC[N+]1Cc2c(cc(OC)c(OC)c2)CC1)c1nnn(Cc2c(OC)cccc2)c1</chem>           |
| 135 | <chem>O=C(NCC[N+]1Cc2c(cc(OC)c(OC)c2)CC1)c1nnn(Cc2ccc(OC)cc2)c1</chem>           |
| 136 | <chem>O=C(NCCCC[N+]1Cc2c(cc(OC)c(OC)c2)CC1)c1nnn(Cc2cc(O)ccc2)c1</chem>          |
| 137 | <chem>O=C(NCCCC[N+]1Cc2c(cc(OC)c(OC)c2)CC1)c1nnn(Cc2ccc(O)cc2)c1</chem>          |
| 138 | <chem>O=C(NCCCC[N+]1Cc2c(cc(OC)c(OC)c2)CC1)c1nnn(-c2ccc(OC)cc2)c1</chem>         |
| 139 | <chem>O=C(NCCCC[N+]1Cc2c(cc(OC)c(OC)c2)CC1)c1nnn(-c2cc(OC)ccc2)c1</chem>         |
| 140 | <chem>O=C(NCCCC[N+]1Cc2c(cc(OC)c(OC)c2)CC1)c1nnn(-c2c(OC)cccc2)c1</chem>         |
| 141 | <chem>O=C(NCCCC[N+]1Cc2c(cc(OC)c(OC)c2)CC1)c1nnn(Cc2cc(OC)ccc2)c1</chem>         |
| 142 | <chem>O=C(NCCCC[N+]1Cc2c(cc(OC)c(OC)c2)CC1)c1nnn(Cc2c(OC)cccc2)c1</chem>         |
| 143 | <chem>O=C(NCCCC[N+]1Cc2c(cc(OC)c(OC)c2)CC1)c1nnn(Cc2ccc(OC)cc2)c1</chem>         |
| 144 | <chem>FCCn1nnc(-c2ccc(C(=O)NCCCC[N+]3Cc4c(cc(OC)c(OC)c4)CC3)cc2)c1</chem>        |
| 145 | <chem>FCCOc1cc(-n2nnc(C(=O)NCCCC[N+]3Cc4c(cc(OC)c(OC)c4)CC3)c2)ccc1</chem>       |
| 146 | <chem>FCCOc1c(-n2nnc(C(=O)NCCCC[N+]3Cc4c(cc(OC)c(OC)c4)CC3)c2)cccc1</chem>       |
| 147 | <chem>FCCOc1ccc(-n2nnc(C(=O)NCCCC[N+]3Cc4c(cc(OC)c(OC)c4)CC3)c2)cc1</chem>       |
| 148 | <chem>Clc1c(Cl)ccc(CC(=O)OCCN2CCN(c3c4c(c([N+](=O)[O-])cc3)C=CC4)CC2)c1</chem>   |
| 149 | <chem>Clc1ccc(C(C(=O)OCCN2CCN(c3c4c(c([N+](=O)[O-])cc3)C=CC4)CC2)(C)C)cc1</chem> |
| 150 | <chem>O=[N+](O)c1c2c(c(N3CCN(CCOC(=O)C4(c5cccc5)CCCC4)CC3)cc1)CC=C2</chem>       |
| 151 | <chem>O=[N+](O)c1c2c(c(N3CCN(CC4CCCC4)CC3)cc1)CC=C2</chem>                       |
| 152 | <chem>O=[N+](O)c1c2c(c(N3CCN(CCCC)CC3)cc1)CC=C2</chem>                           |
| 153 | <chem>Clc1cc(C2(O)CCN(CCN3CCN(c4c5c(c([N+](=O)[O-])cc4)C=CC5)CC3)CC2)ccc1</chem> |
| 154 | <chem>O=[N+](O)c1c2c(c(N3CCN(CC4CCCC4)CC3)cc1)CC=C2</chem>                       |
| 155 | <chem>O=[N+](O)c1c2c(c(N3CCN(C4CCCC4)CC3)cc1)CC=C2</chem>                        |
| 156 | <chem>Fc1cc2n(-c3ccc(F)cc3)cc(CCCCN3Cc4c(cc(OC)c(OC)c4)CC3)c2cc1</chem>          |
| 157 | <chem>Fc1ccc(-n2c3c(c(CCCCN4Cc5c(cc(OC)c(OC)c5)C4)c2)cccc3)cc1</chem>            |
| 158 | <chem>Fc1ccc(-n2c3c(c(CCCCN4Cc5c(cc(OC)c(OC)c5)CC4)c2)cccc3)cc1</chem>           |
| 159 | <chem>FCCOc1cc(N2CCN(CCCc3c4c(n(-c5ccc(F)cc5)c3)cccc4)CC2)ccc1</chem>            |

References cited in Table S1.

1. Xie, F.; Kniess, T.; Neuber, C.; Deuther-Conrad, W.; Mamat, C.; Lieberman, B. P.; Liu, B.; Mach, R. H.; Brust, P.; Steinbach, J.; Pietzsch, J.; Jia, H., Novel indole-based sigma-2 receptor ligands: synthesis, structure–affinity relationship and antiproliferative activity. *MedChemComm* **2015**, 6, 1093-1103.
2. Xie, F.; Bergmann, R.; Kniess, T.; Deuther-Conrad, W.; Mamat, C.; Neuber, C.; Liu, B.; Steinbach, J.; Brust, P.; Pietzsch, J.; Jia, H., (18)F-Labeled 1,4-Dioxa-8-azaspiro[4.5]decane Derivative: Synthesis and Biological Evaluation of a sigma1 Receptor Radioligand with Low Lipophilicity as Potent Tumor Imaging Agent. *J Med Chem* **2015**, 58, 5395-407.
3. Schininà, B.; Martorana, A.; Colabufo, N. A.; Contino, M.; Niso, M.; Perrone, M. G.; De Guidi, G.; Catalfo, A.; Rappazzo, G.; Zuccarello, E.; Prezzavento, O.; Amata, E.; Rescifina, A.; Marrazzo, A., 4-Nitro-2,1,3-benzoxadiazole derivatives as potential fluorescent sigma receptor probes. *RSC Advances* **2015**, 5, 47108-47116.
4. Bai, S.; Li, S.; Xu, J.; Peng, X.; Sai, K.; Chu, W.; Tu, Z.; Zeng, C.; Mach, R. H., Synthesis and structure-activity relationship studies of conformationally flexible tetrahydroisoquinoliny triazole carboxamide and triazole substituted benzamide analogues as sigma2 receptor ligands. *J Med Chem* **2014**, 57, 4239-51.
5. Niso, M.; Abate, C.; Contino, M.; Ferorelli, S.; Azzariti, A.; Perrone, R.; Colabufo, N. A.; Berardi, F., Sigma-2 receptor agonists as possible antitumor agents in resistant tumors: hints for collateral sensitivity. *ChemMedChem* **2013**, 8, 2026-35.
6. Abate, C.; Ferorelli, S.; Niso, M.; Lovicario, C.; Infantino, V.; Convertini, P.; Perrone, R.; Berardi, F., 2-Aminopyridine derivatives as potential sigma(2) receptor antagonists. *ChemMedChem* **2012**, 7, 1847-57.
7. Yarim, M.; Koksall, M.; Schepmann, D.; Wunsch, B., Synthesis and in vitro Evaluation of Novel Indole-Based Sigma Receptors Ligands. *Chem Biol Drug Des* **2011**, 78, 869-75.
8. Ferorelli, S.; Abate, C.; Pedone, M. P.; Colabufo, N. A.; Contino, M.; Perrone, R.; Berardi, F., Synthesis and binding assays of novel 3,3-dimethylpiperidine derivatives with various lipophilicities as sigma(1) receptor ligands. *Bioorg Med Chem* **2011**, 19, 7612-22.
9. Abate, C.; Niso, M.; Lacivita, E.; Mosier, P. D.; Toscano, A.; Perrone, R., Analogues of sigma receptor ligand 1-cyclohexyl-4-[3-(5-methoxy-1,2,3,4-tetrahydronaphthalen-1-yl)propyl]piperazine (PB28) with added polar functionality and reduced lipophilicity for potential use as positron emission tomography radiotracers. *J Med Chem* **2011**, 54, 1022-32.
10. Abate, C.; Ferorelli, S.; Contino, M.; Marottoli, R.; Colabufo, N. A.; Perrone, R.; Berardi, F., Arylamides hybrids of two high-affinity sigma2 receptor ligands as tools for the development of PET radiotracers. *Eur J Med Chem* **2011**, 46, 4733-41.

11. Ferorelli, S.; Abate, C.; Colabufo, N. A.; Niso, M.; Inglese, C.; Berardi, F.; Perrone, R., Design and evaluation of naphthol- and carbazole-containing fluorescent sigma ligands as potential probes for receptor binding studies. *J Med Chem* **2007**, 50, 4648-55.
12. Berardi, F.; Ferorelli, S.; Abate, C.; Pedone, M. P.; Colabufo, N. A.; Contino, M.; Perrone, R., Methyl substitution on the piperidine ring of N-[omega-(6-methoxynaphthalen-1-yl)alkyl] derivatives as a probe for selective binding and activity at the sigma(1) receptor. *J Med Chem* **2005**, 48, 8237-44.
13. Mach, R. H.; Huang, Y.; Freeman, R. A.; Wu, L.; Vangveravong, S.; Luedtke, R. R., Conformationally-flexible benzamide analogues as dopamine D3 and sigma 2 receptor ligands. *Bioorg Med Chem Lett* **2004**, 14, 195-202.
14. Berardi, F.; Ferorelli, S.; Abate, C.; Colabufo, N. A.; Contino, M.; Perrone, R.; Tortorella, V., 4-(tetralin-1-yl)- and 4-(naphthalen-1-yl)alkyl derivatives of 1-cyclohexylpiperazine as sigma receptor ligands with agonist sigma2 activity. *J Med Chem* **2004**, 47, 2308-17.
15. Mach, R. H.; Huang, Y.; Freeman, R. A.; Wu, L.; Blair, S.; Luedtke, R. R., Synthesis of 2-(5-Bromo-2,3-dimethoxyphenyl)-5-(aminomethyl)-1H-pyrrole analogues and their binding affinities for dopamine D2, D3, and D4 receptors. *Bioorganic & Medicinal Chemistry* **2003**, 11, 225-233.
